# Supplementary material
Source: PubMed Central journal article supplement (PMC4597141)
Supplement: supp_M115.049312_mcp.M115.049312-1.pdf [file supp_M115.049312_mcp.M115.049312-1.pdf]

**Table S1: Protein preparation method, separation, separation column length and gradient time of liquid chromatography as well as mass spectrometers used for USSC secretome analysis are summarized.** In total, 1520 proteins were determined.

| Run                            | Run1              | Run2              | Run3              | Run4           | Run5           | Run6           | Run7              |
|--------------------------------|-------------------|-------------------|-------------------|----------------|----------------|----------------|-------------------|
| concentration                  | TCA precipitation | TCA precipitation | TCA precipitation | lyophilisation | lyophilisation | lyophilisation | lyophilisation    |
| pre-separation                 | short gel         | short gel         | short gel         | short gel      | short gel      | short gel      | 1D-PAGE, 12 lanes |
| separation column length, time | 25 cm, 2h         | 50 cm, 2h         | 25 cm, 2h         | 50 cm, 2h      | 50 cm, 2h      | 50 cm, 2h      | 50 cm, 12 x 2h    |
| Mass spectrometer              | LTQ OT Velos      | LTQ OT Velos      | LTQ OT Velos      | LTQ OT Velos   | LTQ OT Elite   | LTQ OT Elite   | LTQ OT Elite      |
| Proteins (n)                   | 461               | 462               | 337               | 699            | 535            | 483            | 865               |
